# Supplementary material for: 68Ga-PSMA PET/CT in radioactive iodine-refractory differentiated thyroid cancer and first treatment results with 177Lu-PSMA-617
Source: Springer Nature journal article supplement (doi:10.1186/s13550-020-0610-x), 2020-03-06

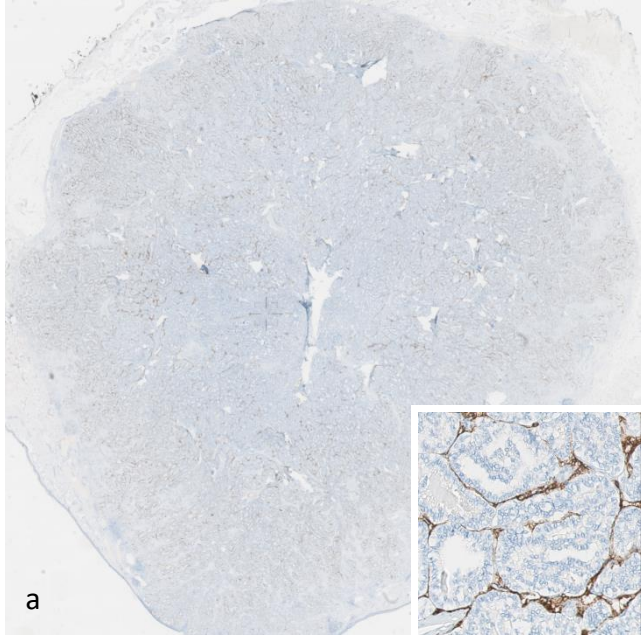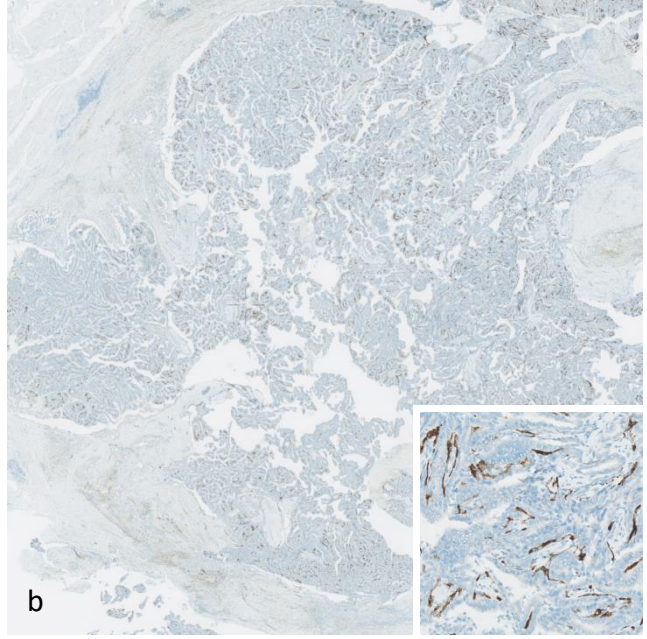

Supplement: MOESM1 [file 17778222]
